# Supplementary material for: Depletion of Lipocalin 2 (LCN2) in Mice Leads to Dysbiosis and Persistent Colonization with Segmented Filamentous Bacteria
Source: MDPI journal article supplement (doi:10.3390/ijms222313156), 2021-12-05

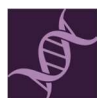

## Supplements

# Depletion of Lipocalin 2 (LCN2) in Mice Leads to Dysbiosis and Persistent Colonization with Segmented Filamentous Bacteria

Patrick Klüber <sup>1,†</sup>, Steffen K. Meurer <sup>2,†</sup>, Jessica Lambertz <sup>2,†</sup>, Roman Schwarz <sup>3</sup>, Silke Zechel-Gran <sup>1</sup>, Till Braunschweig <sup>4</sup>, Sabine Hurka <sup>5</sup>, Eugen Domann <sup>6,\*</sup> and Ralf Weiskirchen <sup>2,\*</sup>

**Table S1.** Mouse primers used in real-time quantitative PCR.

| Gene                 | Acc. No./Ref.  | Primer                                                                       |
|----------------------|----------------|------------------------------------------------------------------------------|
| <i>Lcn2</i>          | NM_008491.1    | For: 5'-ccatctatgagctacaagagaacaat-3'<br>Rev: 5'-tctgatccagtagcgacagc-3'     |
| <i>T-bet</i>         | NM_019507.2    | For: 5' -aagttcaaccagcaccagaca-3'<br>Rev: 5' -cacggtgaaggacaggaatgg-3'       |
| <i>Tgf-β1</i>        | NM_011577.2    | For: 5' -tggagcaacatgtggaactc-3'<br>Rev: 5' -cagcagccggttaccag-3'            |
| <i>Gata3</i>         | NM_008091.3    | For: 5'-cccattaccacatccgcc-3'<br>Rev: 5'-gttcacacactccctgcctt-3'             |
| <i>Il-5</i>          | NM_010558.1    | For: 5' -atgaggcttctgtcctact-3'<br>Rev: 5' -taccacacggacagttga-3'            |
| <i>Il-13</i>         | NM_008355.3    | For: 5' -ggatggagtggtgacctgg-3'<br>Rev: 5' -gccatgcaatatcctctgggt-3'         |
| <i>Tnf-α</i>         | NM_013693.3    | For: 5' -accacgctctctgtctactga-3'<br>Rev: 5' -tccacttggtggttgctacg-3'        |
| <i>Ifn-γ</i>         | NM_008337.4    | For: 5' -ggaggaaactggcaaaagatgg-3'<br>Rev: 5' -tgttgctgatggcctgattgc-3'      |
| <i>Il-1β</i>         | NM_008361.4    | For: 5' -gagctgaaagctctccacctc-3'<br>Rev: 5' -ctttccttgaggcccaaggc-3'        |
| <i>Mcpt1</i>         | NM_008570.1    | For: 5' -gcacttctcttgccttctgg-3'<br>Rev: 5' -taaggacgggagtggtgtct-3'         |
| <i>Mcpt2</i>         | NM_008571.1    | For: 5' -gcacttcttgccttctgg-3'<br>Rev: 5' -taaggacgggagtggtgtt-3'            |
| <i>Mcpt6 (Tpsb2)</i> | NM_010781.3    | For: 5' -tgctgtgtgctggaaatacc-3'<br>Rev: 5' -cccttcacttgcagacca-3'           |
| <i>Nos2</i>          | NM_010927.4    | For: 5'-tgccccttcaatggtggt-3'<br>Rev: 5'-tccttcggccacttct-3'                 |
| <i>RegIIIγ</i>       | NM_011260.2    | For: 5'-ccttctcttctcaggcaat-3'<br>Rev: 5'-taattctcttccacttcagaaatct-3'       |
| <i>Saa1</i>          | NM_009117.4    | For: 5'-cattgttcacgaggttcc-3'<br>Rev: 5'-gttttccagtagcttctctatgt-3'          |
| <i>Saa2</i>          | NM_011314.3    | For: 5'-tgtgtatccacaagggttcaga-3'<br>Rev: 5'-ttattacctctctctcaagca-3'        |
| <i>Il-17a</i>        | NM_010552.3    | For: 5'-ggactctccaccgaatga-3'<br>Rev: 5'-ggcactgagcttccagatc-3'              |
| <i>Il-21</i>         | NM_001291041.1 | For: 5'-catcattgacctctggccc-3'<br>Rev: 5'-acgaatcacaggaaggcat-3'             |
| <i>Il-22</i>         | NM_016971.2    | For: 5'-ggtagcagcagacatcca-3'<br>Rev: 5'-cagttcccaatgcctga-3'                |
| <i>Rorc</i>          | NM_001293734.1 | For: 5'-ggaggacaggagccaagtt-3'<br>Rev: 5'-ccgtagtggatccagatgact-3'           |
| <i>Foxp3</i>         | NM_001199347.1 | For: 5'-agaggtattgagggtgggtgt-3'<br>Rev: 5'-cagcatgggtctgtcttcta-3'          |
| <i>Gapdh</i>         | NM_008084.3    | For: 5'-tgttgaagtcacaggagacaacct-3'<br>Rev: 5'-aacctgccaagtatgatgacatca-3'   |
| <i>β-actin</i>       | NM_007393.5    | For: 5' -ctctagacttcgagcaggagatgg-3'<br>Rev: 5' -atgccacaggattccataccaaga-3' |

**Table S2.** Overview of the four experimental animal groups used for microbiome analysis.

| Group | Genotype <sup>1</sup>      | Gender | Number (n) | Age (weeks) |
|-------|----------------------------|--------|------------|-------------|
| 1     | WT                         | female | 5          | 6           |
| 2     | WT                         | male   | 3          | 12          |
| 3     | <i>Lcn2</i> <sup>-/-</sup> | female | 3          | 4, 6, 9     |
| 4     | <i>Lcn2</i> <sup>-/-</sup> | male   | 2          | 7           |

<sup>1</sup> Abbreviations used are: *Lcn2*<sup>-/-</sup>, deficient for Lipocalin 2; WT, wild type

**Table S3.** Composition of the diet.

| Ingredient              | Composition                                                                                                                                                                                                                                                                                                                                              |
|-------------------------|----------------------------------------------------------------------------------------------------------------------------------------------------------------------------------------------------------------------------------------------------------------------------------------------------------------------------------------------------------|
| Crude Nutrients [%]     | Dry matter (87.7); Crude protein (19.0); Crude fat (3.3); Crude fibre (4.9); Crude ash (6.4); N free extracts (54.1); Starch (36.5); Sugar (4.7)                                                                                                                                                                                                         |
| Minerals [%]            | Calcium (1.0); Phosphorus (0.70); Sodium (0.24); Magnesium (0.22); Potassium (0.91)                                                                                                                                                                                                                                                                      |
| Fatty acids [%]         | C 14:0 (0.01); C 16:0 (0.47); C 16:1 (0.01); C 18:0 (0.08); C 18:1 (0.62); C 18:2 (1.80); C 20:0 (0.01); C 20:1 (0.02)                                                                                                                                                                                                                                   |
| Amino acids [%]         | Lysine (1.00); Methionine (0.30); Methionine +Cysteine (0.65); Threonine (0.68); Tryptophan (0.25); Arginine (1.14); Histidine (0.44); Valine (0.88); Isoleucine (0.76); Leucine (1.30); Phenylalanine (0.85); Phenylalanine +Tyrosine (1.43); Glycine (0.80); Glutamic acid (3.90); Aspartic acid (1.61); Proline (1.25); Alanine (0.79); Serine (0.89) |
| Vitamins (per kg)       | Vitamin A (15,000 IU); Vitamin D3 (1,000 IU); Vitamin E (110 mg); Vitamin E as menadione (5 mg); Thiamine (18 mg); Riboflavin (23 mg); Pyridoxine (21 mg); Cobalamin (100 µg); Nicotinic acid (135 mg); Pantothenic acid (43 mg); Folic acid (7 mg); Biotin (525 µg); Choline-chloride (2,990 mg); Inositol (100 mg)                                     |
| Trace elements (per kg) | Iron (179 mg); Manganese (69 mg); Zinc (94 mg); Copper (16 mg); Iodine (2.2 mg); Selenium (0.3 mg); Cobalt (2.1 mg)                                                                                                                                                                                                                                      |

**Table S4.** Listing and combination of the index primers used. Sample assignment is based on animal groups 1-4 with the corresponding sample identification.

| Sample                     | Sample assignment                               | Index primer 1 | Index primer 2 |
|----------------------------|-------------------------------------------------|----------------|----------------|
| Wild type                  | 1.1                                             | N 716          | S 511          |
|                            | 1.2                                             | N 718          | S 511          |
|                            | 1.3                                             | N 719          | S 511          |
|                            | 2.1                                             | N 720          | S 511          |
|                            | 2.2                                             | N 721          | S 511          |
|                            | 2.3                                             | N 722          | S 511          |
|                            | 2.4                                             | N 723          | S 511          |
|                            | 2.5                                             | N 724          | S 511          |
|                            | 2.6                                             | N 726          | S 511          |
|                            | 2.7                                             | N 727          | S 511          |
| <i>Lcn2</i> <sup>-/-</sup> | 3.1                                             | N 728          | S 511          |
|                            | 3.2                                             | N 729          | S 511          |
|                            | 3.3                                             | N 716          | S 510          |
|                            | 3.4                                             | N 718          | S 510          |
|                            | 3.5                                             | N 719          | S 510          |
|                            | 3.6                                             | N 720          | S 510          |
|                            | 3.7                                             | N 721          | S 510          |
|                            | 4.1                                             | N 722          | S 510          |
|                            | 4.2                                             | N 723          | S 510          |
|                            | 4.3                                             | N 724          | S 510          |
|                            | 4.4                                             | N 726          | S 507          |
|                            | 4.5                                             | N 727          | S 507          |
| Controls                   | (-) reaction mix (DNA extraction)               | N 728          | S 507          |
|                            | (-) no template control 16S rRNA PCR            | N 729          | S 507          |
|                            | (+) chromosomal DNA <i>E. coli</i> 16S rRNA PCR | N 716          | S 507          |
|                            | (+) mock community 16S rRNA PCR                 | N 718          | S 507          |

**Table S5.** Bacterial primers used in PCR.

| Gene                      | Designation | Primer <sup>1</sup>              |
|---------------------------|-------------|----------------------------------|
| <i>V3-region 16S rRNA</i> | 341-F       | For: 5'-attaccgcggtgctg-3'       |
| <i>V3-region 16S rRNA</i> | 534-R       | Rev: 5'-cctacgggagcagcag-3'      |
| <i>SFB 16S rRNA</i>       | 779-F       | For: 5'-tgtgggttgtaataacaat-3'   |
| <i>SFB 16S rRNA</i>       | 1008-R      | Rev: 5'-gcgggcttcctcattacaagg-3' |
| <i>SFB 16S rRNA</i>       | 1380-R      | Rev: 5'-ggtagccacaggcttcgg-3'    |

<sup>1</sup> All primer sequences were obtained from Yin *et al.*, *ISME J.* **2013**, *7*, 615-21.

**Figure S1.** Relative share of genera [% of total reads] at sample level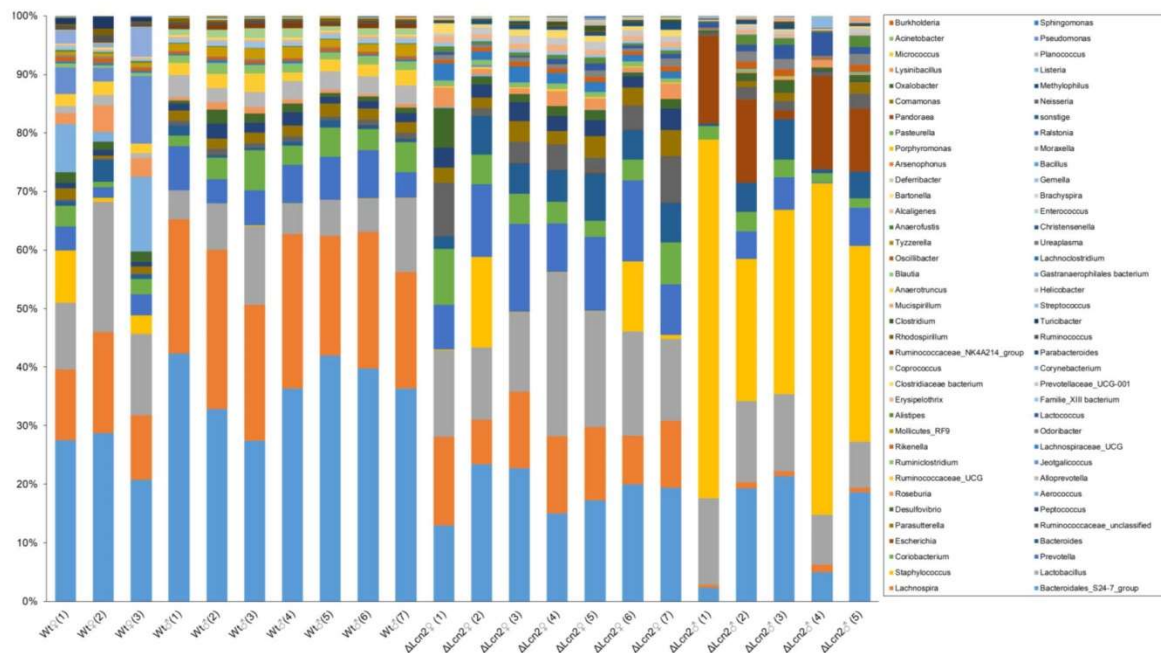

**Figure S2.** Shannon index rarefaction curves at the sample level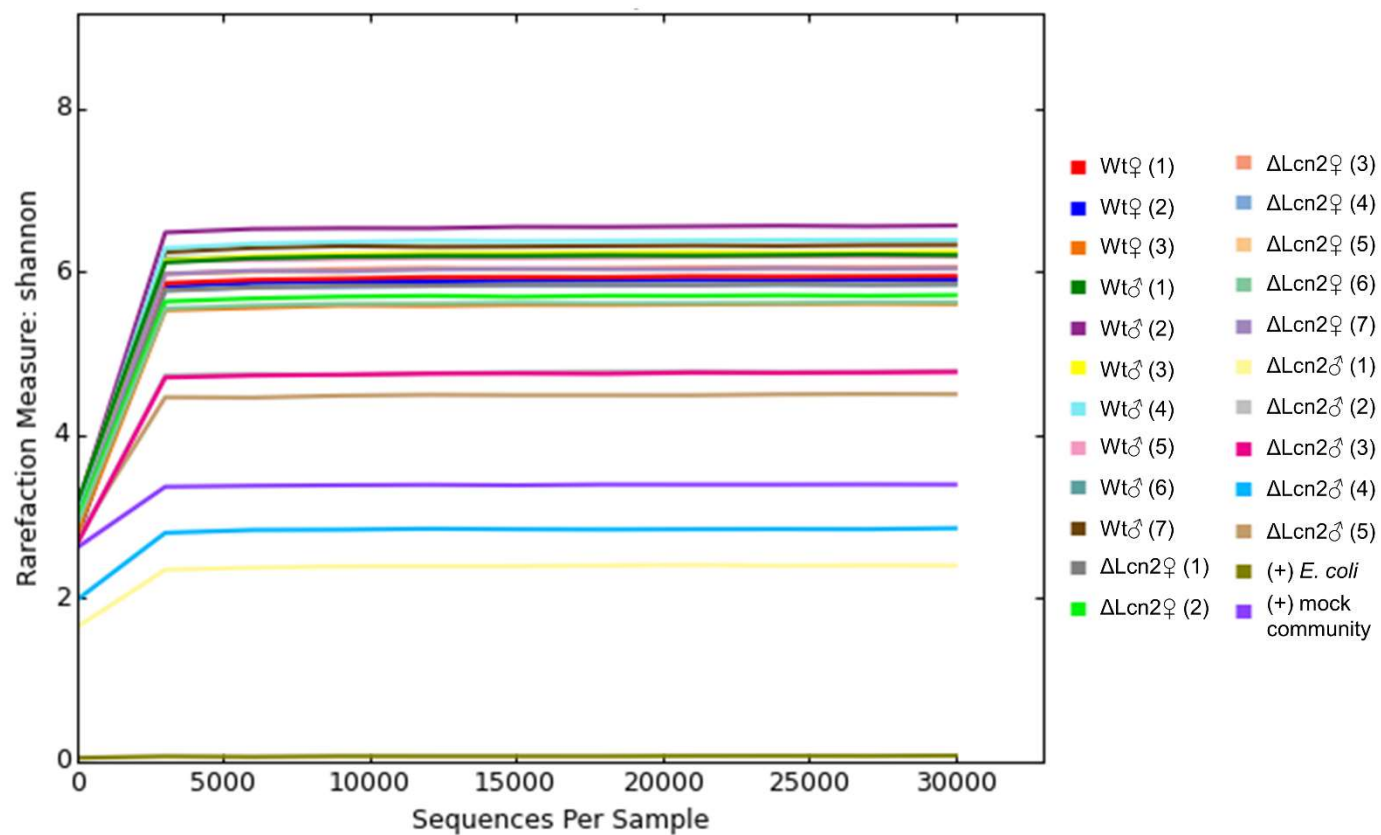

Supplement: s1 [file s1]
